# Supplementary material for: New Magic Au24 Cluster Stabilized by PVP: Selective Formation, Atomic Structure, and Oxidation Catalysis
Source: PubMed Central journal article supplement — JACS Au. 2021 Apr 14;1(5):660–8. doi: 10.1021/jacsau.1c00102 (PMC8395683; doi:10.1021/jacsau.1c00102), 2021-04-14
Supplement: au1c00102_si_001.pdf [file au1c00102_si_001.pdf]

## Supporting Information

### New Magic Au<sub>24</sub> Cluster Stabilized by PVP: Selective Formation, Atomic Structure, and Oxidation Catalysis

Shingo Hasegawa,<sup>1</sup> Shinjiro Takano,<sup>1</sup> Koji Harano,<sup>1</sup> and Tatsuya Tsukuda\*<sup>1,2</sup>

<sup>1</sup> Department of Chemistry, Graduate School of Science, The University of Tokyo, 7-3-1 Hongo, Bunkyo-ku, Tokyo 113-0033, Japan.

<sup>2</sup> Elements Strategy Initiative for Catalysts and Batteries (ESICB), Kyoto University, Katsura, Kyoto 615-8520, Japan.

**Table S1. Structural Parameters Obtained by Curve-Fitting Analysis of Au L<sub>3</sub>-Edge EXAFS**

| Sample                                                             | Bond  | CN <sup>a</sup> | r / Å <sup>b</sup> | σ <sup>2</sup> / Å <sup>2</sup> <sup>c</sup> | R / % <sup>d</sup> |
|--------------------------------------------------------------------|-------|-----------------|--------------------|----------------------------------------------|--------------------|
| Au <sub>24</sub> :PVP as synthesized<br>(Fig. 2c, Fig. S19: black) | Au-Cl | 0.7 ± 0.2       | 2.34 ± 0.02        | 0.007 ± 0.004                                | 7.4                |
|                                                                    | Au-Au | 4.2 ± 0.5       | 2.71 ± 0.01        | 0.0086 ± 0.0009                              |                    |
| Au <sub>24</sub> :PVP after catalytic usage<br>(Fig. S19: red)     | Au-Au | 4.7 ± 0.4       | 2.72 ± 0.01        | 0.0094 ± 0.0008                              | 15.0               |

<sup>a</sup> Coordination number. <sup>b</sup> Bond length. <sup>c</sup> Debye-Waller factor.

<sup>d</sup>  $R = (\sum (k^3\chi^{\text{data}}(k) - k^3\chi^{\text{fit}}(k))^2)^{1/2} / (\sum (k^3\chi^{\text{data}}(k))^2)^{1/2}$ .

**Table S2. Au-Au Coordination Numbers (CNs) and Average Au-Au Bond Lengths (<r>) of DFT-Optimized Au<sub>24</sub> in Figure 3 and Au<sub>24</sub>Cl<sub>4</sub> in Figure 4.**

| Au <sub>24</sub> |                 |                      | Au <sub>24</sub> Cl <sub>4</sub> |                 |                      |
|------------------|-----------------|----------------------|----------------------------------|-----------------|----------------------|
| Structure        | CN <sup>a</sup> | <r> / Å <sup>a</sup> | Structure                        | CN <sup>a</sup> | <r> / Å <sup>a</sup> |
| <b>1</b>         | 5.2             | 2.88                 | <b>1Cl</b>                       | 4.8             | 2.86                 |
| <b>2</b>         | 5.0             | 2.88                 | <b>2Cl</b>                       | 4.6             | 2.85                 |
| <b>3</b>         | 5.4             | 2.89                 | <b>3Cl</b>                       | 4.3             | 2.86                 |
| <b>4</b>         | 5.3             | 2.87                 | <b>4Cl</b>                       | 4.3             | 2.85                 |
| <b>5</b>         | 5.2             | 2.90                 | <b>5Cl</b>                       | 4.3             | 2.87                 |
| <b>6</b>         | 5.3             | 2.88                 | <b>6Cl</b>                       | 4.2             | 2.87                 |
| <b>7</b>         | 5.0             | 2.90                 |                                  |                 |                      |

<sup>a</sup> Pairs of Au atoms with an interatomic distance smaller than 3.05 Å were considered to be bonded.

**Table S3. Adsorption Energies and Stretching Frequencies of CO at Different Sites of Structure 1.**

| Structure               | E <sub>ads</sub> / eV | v(CO) / cm <sup>-1</sup> | Structure               | E <sub>ads</sub> / eV | v(CO) / cm <sup>-1</sup> |
|-------------------------|-----------------------|--------------------------|-------------------------|-----------------------|--------------------------|
| <b>1COa<sup>0</sup></b> | 0.32                  | 2109                     | <b>1COa<sup>-</sup></b> | 0.22                  | 2066                     |
| <b>1COb<sup>0</sup></b> | 0.28                  | 2109                     | <b>1COb<sup>-</sup></b> | 0.10                  | 2020                     |
| <b>1COc<sup>0</sup></b> | 0.27                  | 2113                     | <b>1COc<sup>-</sup></b> | 0.29                  | 2065                     |
| <b>1COd<sup>0</sup></b> | 0.23                  | 2103                     | <b>1COd<sup>-</sup></b> | 0.14                  | 2032                     |
| <b>1COe<sup>0</sup></b> | 0.23                  | 2110                     | <b>1COe<sup>-</sup></b> | 0.21                  | 2070                     |
| <b>1COf<sup>0</sup></b> | 0.17                  | 2108                     | <b>1COf<sup>-</sup></b> | 0.11                  | 2073                     |
| <b>1COg<sup>0</sup></b> | 0.13                  | 2113                     | <b>1COg<sup>-</sup></b> | 0.16                  | 2067                     |
| <b>1COh<sup>0</sup></b> | 0.11                  | 2105                     | <b>1COh<sup>-</sup></b> | 0.17                  | 2068                     |

**Table S4. Adsorption Energies and Stretching Frequencies of CO at Different Sites of Structure 4.**

| Structure               | E <sub>ads</sub> / eV | v(CO) / cm <sup>-1</sup> | Structure               | E <sub>ads</sub> / eV | v(CO) / cm <sup>-1</sup> |
|-------------------------|-----------------------|--------------------------|-------------------------|-----------------------|--------------------------|
| <b>4COa<sup>0</sup></b> | 0.42                  | 2103                     | <b>4COa<sup>-</sup></b> | 0.31                  | 2066                     |
| <b>4COb<sup>0</sup></b> | 0.23                  | 2118                     | <b>4COb<sup>-</sup></b> | 0.28                  | 2066                     |
| <b>4COc<sup>0</sup></b> | 0.19                  | 2107                     | <b>4COc<sup>-</sup></b> | 0.38                  | 2059                     |

## Description of the Supplementary Movies

**Movie S1:** ACTEM video of a single particle (#8) of Au<sub>24</sub>:PVP (*t*: 24.04 – 36.00 s from the beginning of the video recording). The frame rate (5 fps) is five times slower than the actual rate (25 fps).

**Movie S2:** ACTEM video of a single particle (#8) of Au<sub>24</sub>:PVP (*t*: 60.04 – 72.00 s from the beginning of the video recording). The frame rate (5 fps) is five times slower than actual the rate (25 fps).

**Movie S3:** ACTEM video of a single particle (#8) of Au<sub>24</sub>:PVP (*t*: 84.04 – 96.00 s from the beginning of the video recording). The frame rate (5 fps) is five times slower than the actual rate (25 fps).

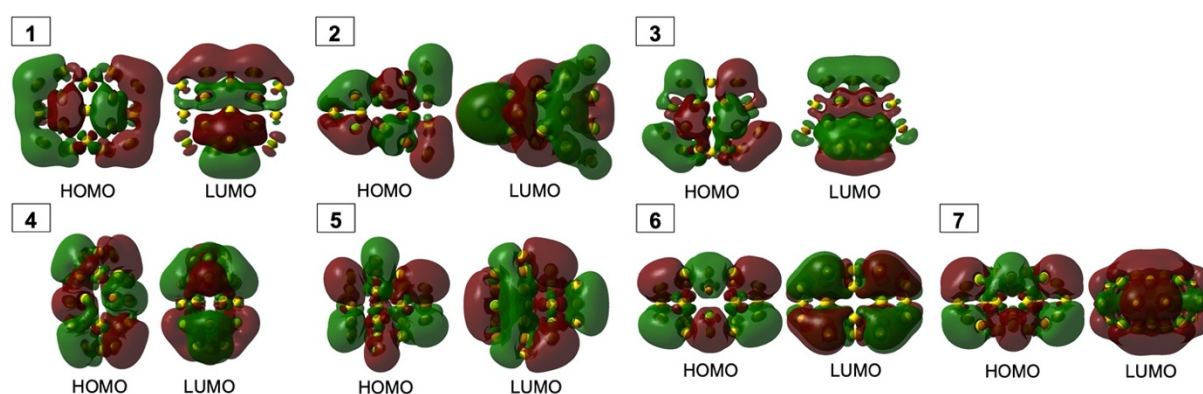

**Figure S1.** Frontier Kohn–Sham orbitals of model Au<sub>24</sub> clusters shown in **Figure 3**.

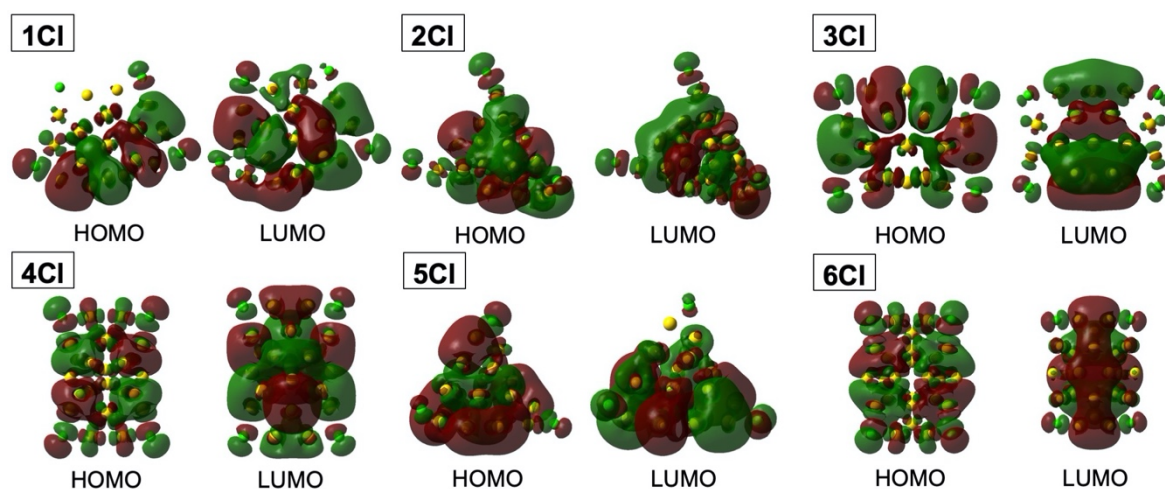

**Figure S2.** Frontier Kohn–Sham orbitals of model Au<sub>24</sub>Cl<sub>4</sub> clusters shown in **Figure 4**.

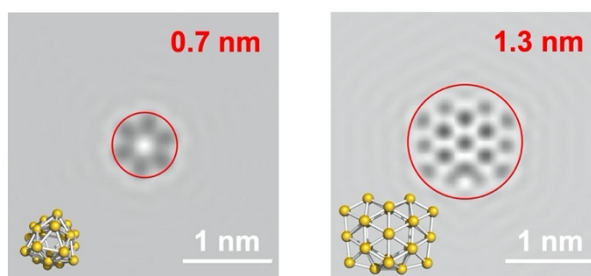

**Figure S3.** Simulated TEM images with (left) minimum (model 4) and (right) maximum (model 1) diameter.

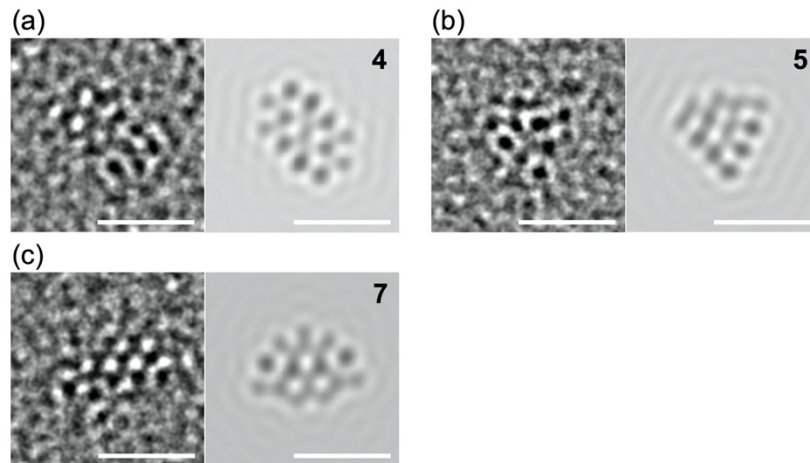

**Figure S4.** ACTEM images of different particles (#5-#7) of Au<sub>24</sub>:PVP and simulated images of the model structures in **Figure 3**. The scale bars correspond to 1 nm.

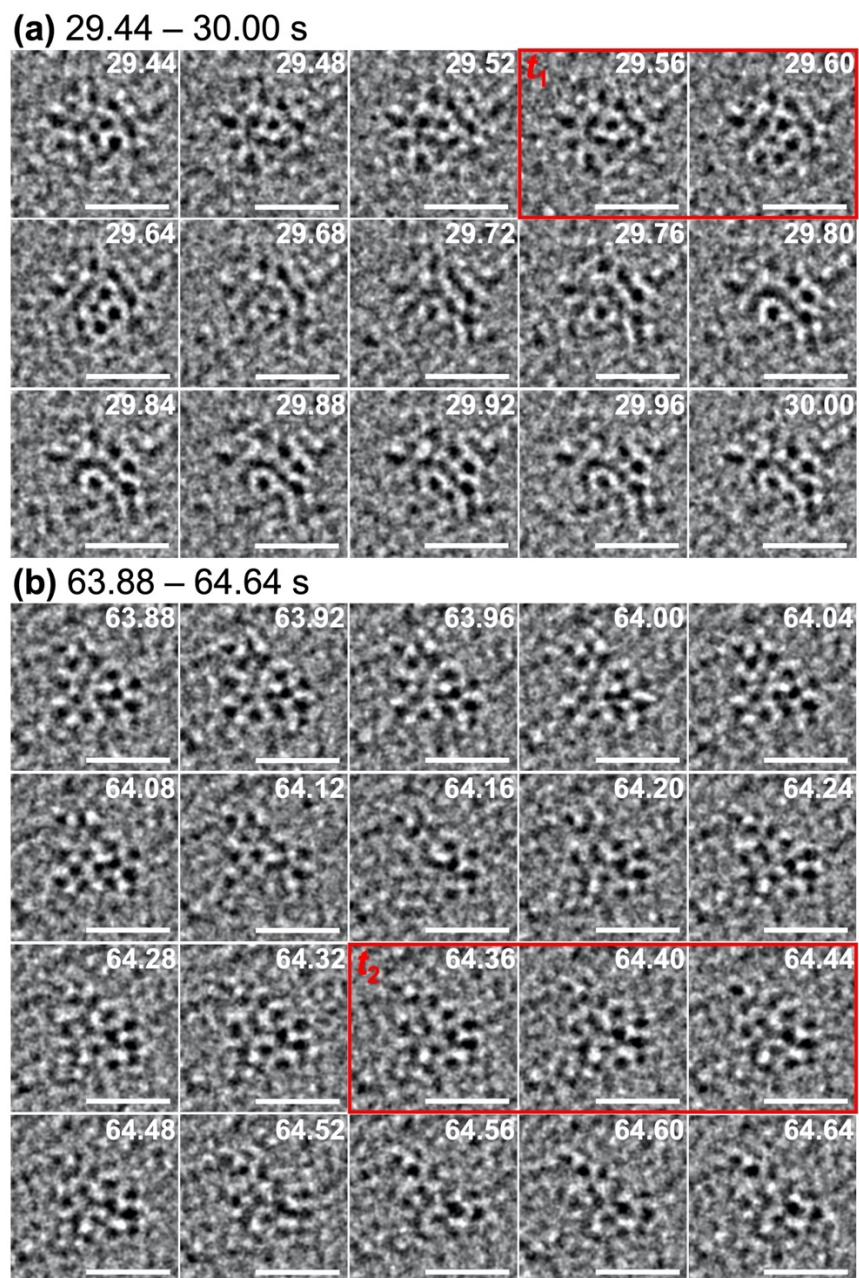

(c) 69.04 – 69.60 s

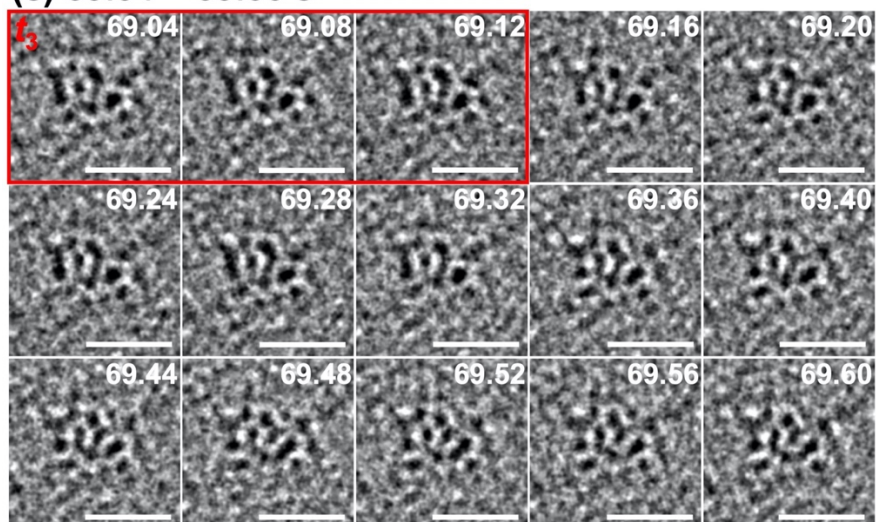

(d) 91.24 – 92.00 s

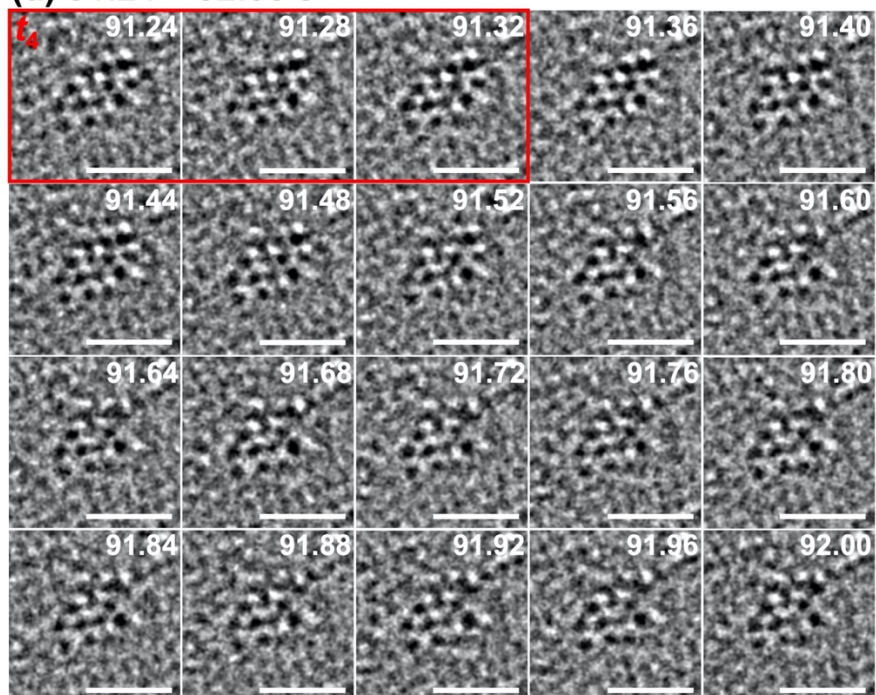

**Figure S5.** AC-TEM image sequences of a single particle of Au<sub>24</sub>:PVP (#8). The value in the upper right of each image shows the time in seconds from the beginning of the video recording. The scale bars correspond to 1 nm. The TEM images at  $t_1$ – $t_4$  in **Figure 6a** were obtained by averaging the images outlined by red lines in (a)–(d), respectively.

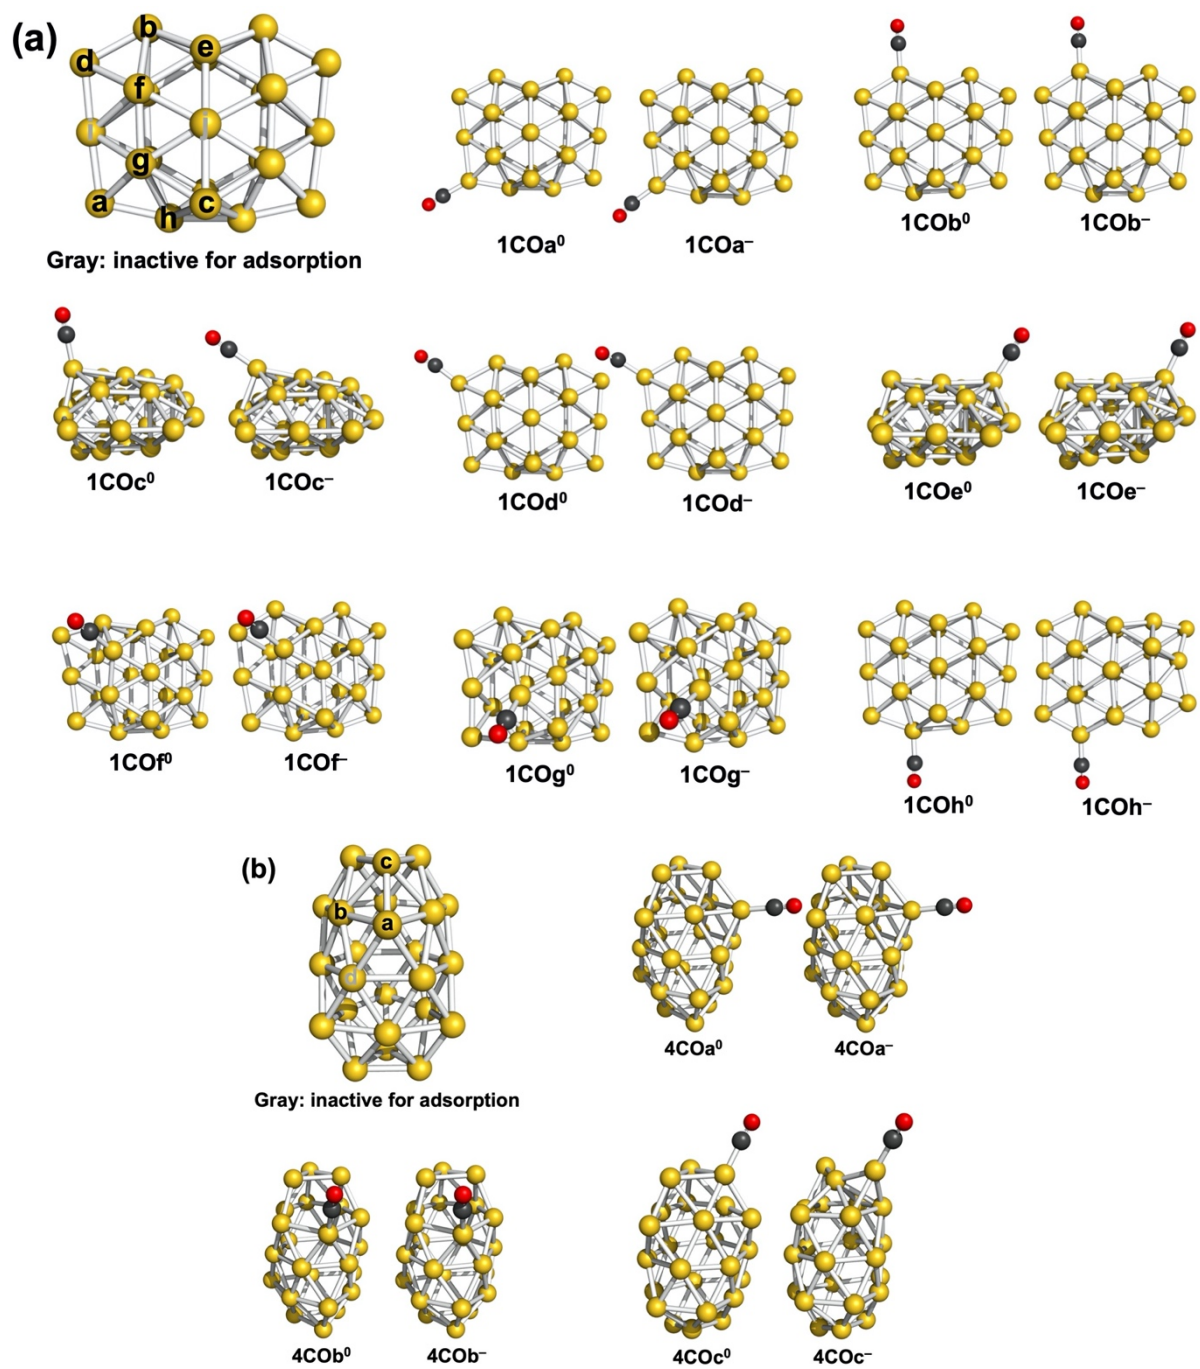

**Figure S6.** Adsorption sites and optimized structures for models (a) **1** and (b) **4**.

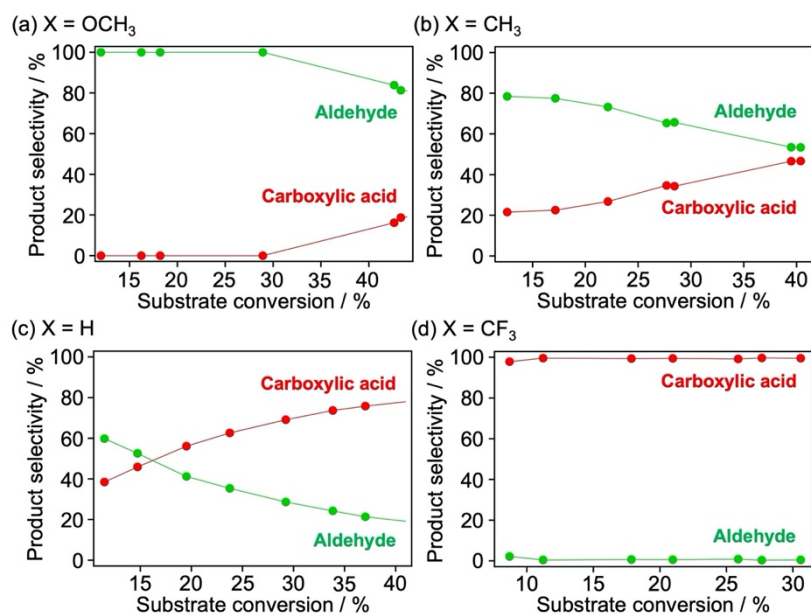

**Figure S7.** Product selectivity of the aerobic oxidation of *p*-substituted benzyl alcohol,  $X\text{-C}_6\text{H}_4\text{CH}_2\text{OH}$  ( $X = \text{OCH}_3, \text{CH}_3, \text{H}, \text{CF}_3$ ), shown in **Figure 8**.

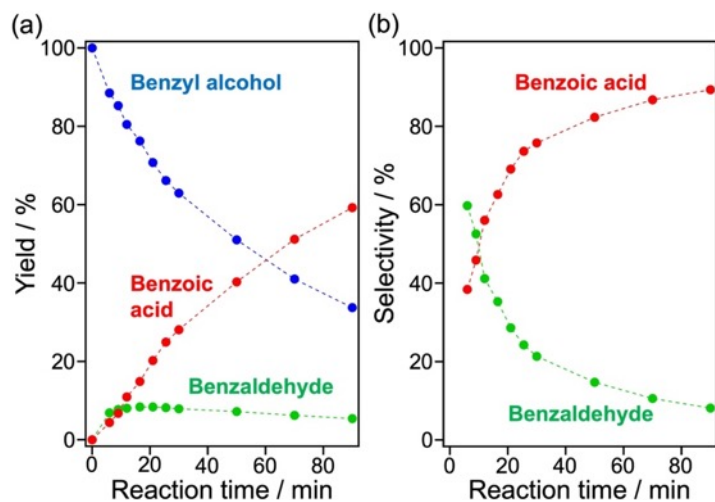

**Figure S8.** Time course of the (a) yield and (b) selectivity in the catalytic oxidation of benzyl alcohol at 303 K.

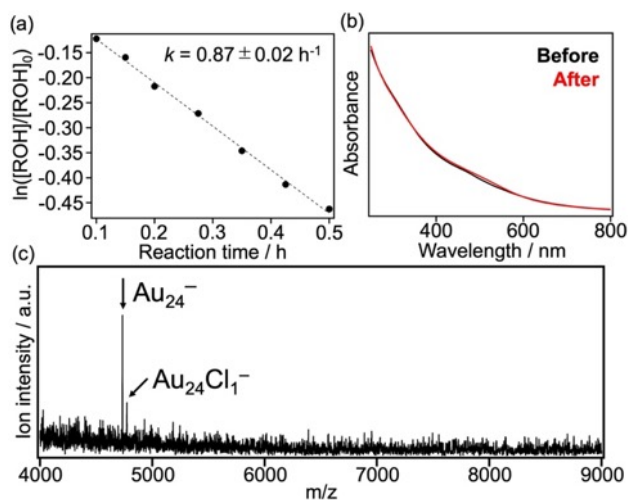

**Figure S9.** (a) Time course of substrate concentration in the catalytic oxidation of benzyl alcohol at 303 K. (b) Optical absorption and (c) MALDI mass spectra of  $\text{Au}_{24}$ :PVP after the catalysis.

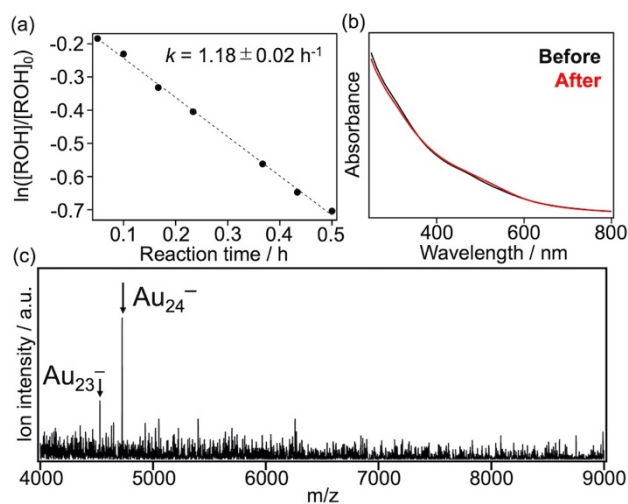

**Figure S10.** (a) Time course of substrate concentration in the catalytic oxidation of benzyl alcohol at 303 K under 1 atm of O<sub>2</sub>. (b) Optical absorption and (c) MALDI mass spectra of Au<sub>24</sub>:PVP after the catalysis.

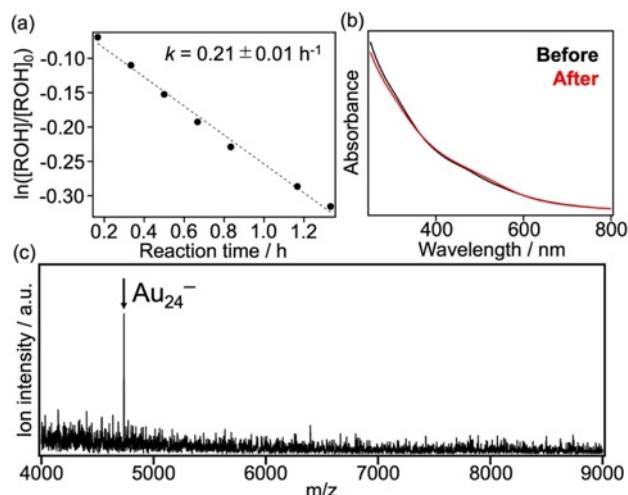

**Figure S11.** (a) Time course of substrate concentration in the catalytic oxidation of deuterated benzyl alcohol (C<sub>6</sub>H<sub>5</sub>CD<sub>2</sub>OH) at 303 K. (b) Optical absorption and (c) MALDI mass spectra of Au<sub>24</sub>:PVP after the catalysis.

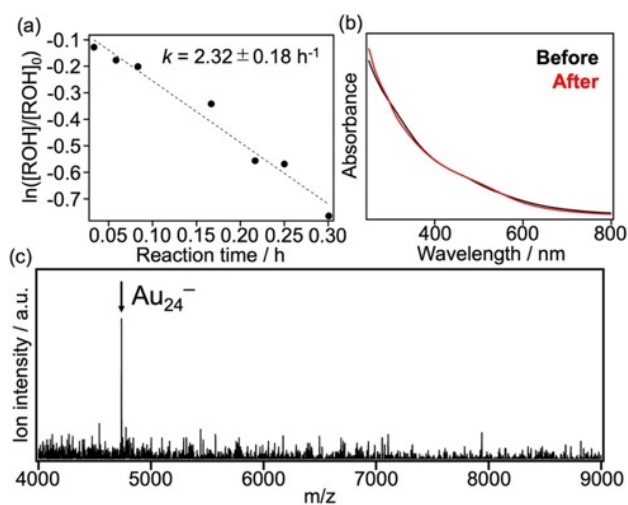

**Figure S12.** (a) Time course of substrate concentration in the catalytic oxidation of *p*-methoxybenzyl alcohol (CH<sub>3</sub>OC<sub>6</sub>H<sub>4</sub>CH<sub>2</sub>OH) at 303 K. (b) Optical absorption and (c) MALDI mass spectra of Au<sub>24</sub>:PVP after the catalysis.

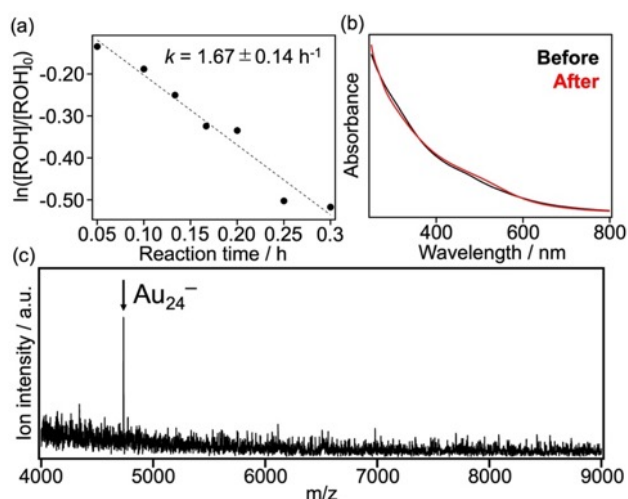

**Figure S13.** (a) Time course of substrate concentration in the catalytic oxidation of *p*-methylbenzyl alcohol ( $\text{CH}_3\text{C}_6\text{H}_4\text{CH}_2\text{OH}$ ) at 303 K. (b) Optical absorption and (c) MALDI mass spectra of  $\text{Au}_{24}$ :PVP after the catalysis.

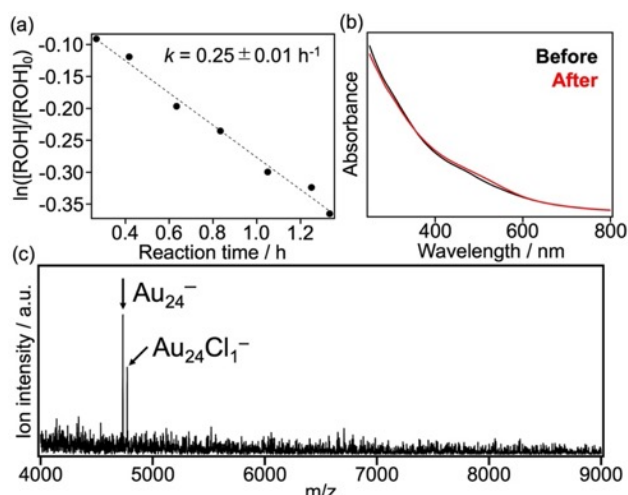

**Figure S14.** (a) Time course of substrate concentration in the catalytic oxidation of *p*-(trifluoromethyl)benzyl alcohol ( $\text{CF}_3\text{C}_6\text{H}_4\text{CH}_2\text{OH}$ ) at 303 K. (b) Optical absorption and (c) MALDI mass spectra of  $\text{Au}_{24}$ :PVP after the catalysis.

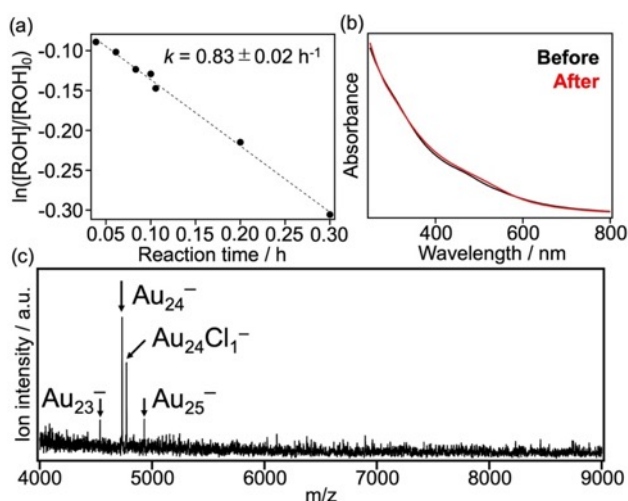

**Figure S15.** (a) Time course of substrate concentration in the catalytic oxidation of benzyl alcohol at 303 K. Although the batch of  $\text{Au}_{24}$ :PVP used for  $\text{O}_2$  pressure dependence, the KIE, and Hammett plot (batch a, **Fig. S9–S14**) is different from that for the Arrhenius plot (batch b, **Fig. S15–S18**), the observed catalytic



activities of the two batches agreed well with each other (Fig. S9 and S15). (b) Optical absorption and (c) MALDI mass spectra of Au<sub>24</sub>:PVP after the catalysis.

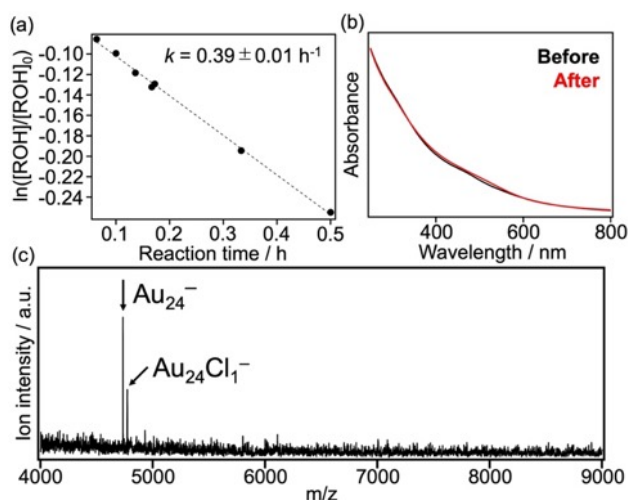

**Figure S16.** (a) Time course of substrate concentration in the catalytic oxidation of benzyl alcohol at 293 K. (b) Optical absorption and (c) MALDI mass spectra of Au<sub>24</sub>:PVP after the catalysis.

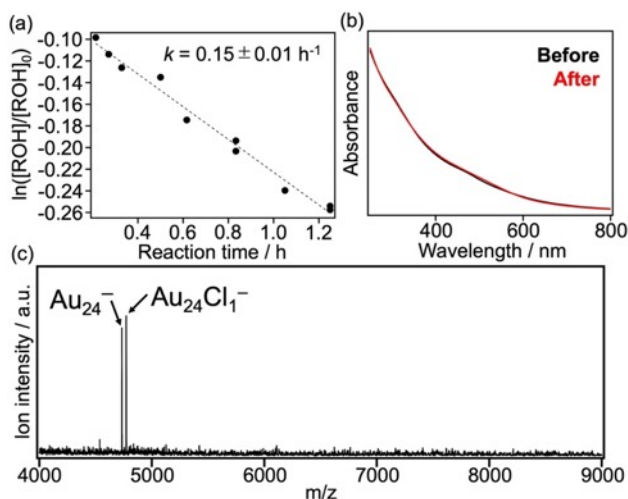

**Figure S17.** (a) Time course of substrate concentration in the catalytic oxidation of benzyl alcohol at 283 K. (b) Optical absorption and (c) MALDI mass spectra of Au<sub>24</sub>:PVP after the catalysis.

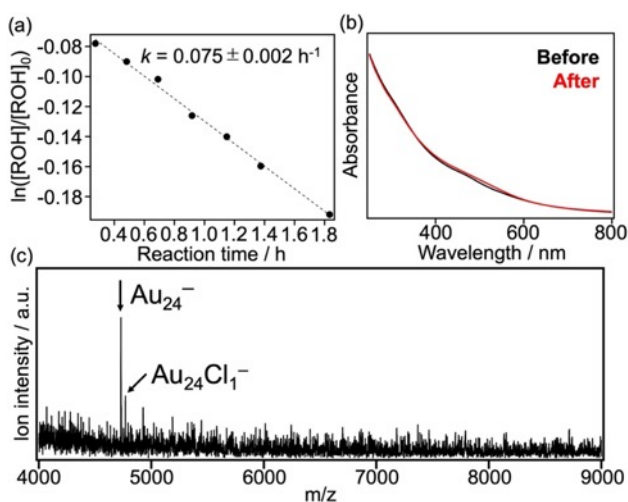

**Figure S18.** (a) Time course of substrate concentration in the catalytic oxidation of benzyl alcohol at 273 K. (b) Optical absorption and (c) MALDI mass spectra of Au<sub>24</sub>:PVP after the catalysis.

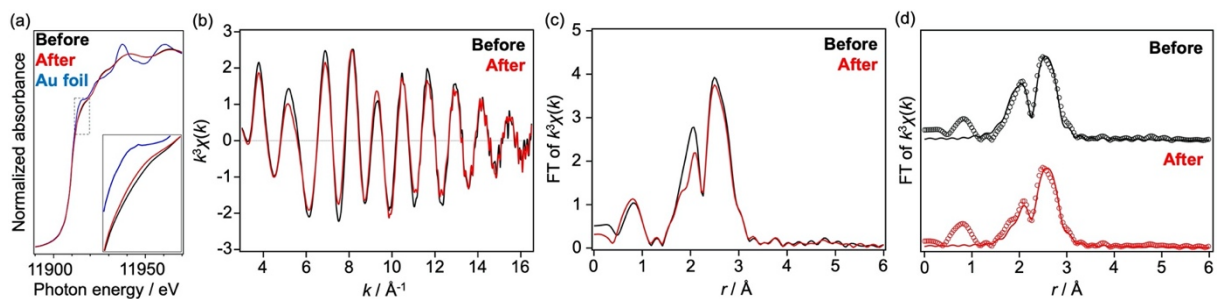

**Figure S19.** Au L<sub>3</sub>-edge (a) XANES, (b) EXAFS, and (c) FT-EXAFS spectra of Au<sub>24</sub>:PVP before (black) and after (red) the catalytic reaction under the same conditions as in **Figure S9** (benzyl alcohol oxidation at 303 K for 30 min). XANES spectrum of Au foil (blue) is also shown in (a) as a reference. (d) Comparison of the experimental (circles) and fitting (solid curve) FT-EXAFS spectra. The FT-EXAFS spectrum before the reaction is identical to that in **Figure 2c**.
